# 1 COVID-19 control across urban-rural gradients

2

3

4 Konstans Wells<sup>1,\*</sup>, Miguel Lurgi<sup>1</sup> Brendan Collins<sup>2,3</sup>, Biagio Lucini<sup>4</sup>, Rowland R. Kao<sup>5</sup>, Alun L.

5 Lloyd<sup>6</sup>, Simon D.W. Frost<sup>7</sup>, Mike B. Gravenor<sup>8</sup>

6

7 <sup>1</sup> *Department of Biosciences, Swansea University, Swansea SA2 8PP, Wales, UK*

8 <sup>2</sup> *Department of Public Health and Policy, University of Liverpool, Liverpool L69 3GB, UK*

9 <sup>3</sup> *Health and Social Services Group, Welsh Government, UK*

10 <sup>4</sup> *Department of Mathematics, Swansea University, Swansea SA2 8PP, Wales, UK*

11 <sup>5</sup> *Royal (Dick) Veterinary School of Veterinary Studies, University of Edinburgh, Midlothian,*

12 *UK*

13 <sup>6</sup> *Biomathematics Graduate Program and Department of Mathematics, North Carolina State*

14 *University, Raleigh, NC 27695, USA*

15 <sup>7</sup> *Microsoft Research Lab, Redmond, Washington, WA 98052, USA and London School of*

16 *Hygiene and Tropical Medicine, London, WC1E 7HT*

17 <sup>8</sup> *Swansea University Medical School, Swansea University, Swansea SA2 8PP, Wales, UK*

18

19 \* Corresponding author

20 E-mail: [k.l.wells@swansea.ac.uk](mailto:k.l.wells@swansea.ac.uk) (KW)

21

22

23

24

25

26

27 **Abstract**

28 Controlling the regional re-emergence of SARS-CoV-2 after its initial spread in ever-  
29 changing personal contact networks and disease landscapes is a challenging task. In a  
30 landscape context, contact opportunities within and between populations are changing rapidly  
31 as lockdown measures are relaxed and a number of social activities re-activated. Using an  
32 individual-based metapopulation model, we explored the efficacy of different control  
33 strategies across an urban-rural gradient in Wales, UK. Our model shows that isolation of  
34 symptomatic cases, or regional lockdowns in response to local outbreaks, have limited  
35 efficacy unless the overall transmission rate is kept persistently low. Additional isolation of  
36 non-symptomatic infected individuals, who may be detected by effective test and trace  
37 strategies, is pivotal to reduce the overall epidemic size over a wider range of transmission  
38 scenarios. We define an ‘urban-rural gradient in epidemic size’ as a correlation between  
39 regional epidemic size and connectivity within the region, with more highly connected urban  
40 populations experiencing relatively larger outbreaks. For interventions focused on regional  
41 lockdowns, the strength of such gradients in epidemic size increased with higher travel  
42 frequencies, indicating a reduced efficacy of the control measure in the urban regions under  
43 these conditions. When both non-symptomatic and symptomatic individuals are isolated or  
44 regional lockdown strategies are enforced, we further found the strongest urban-rural  
45 epidemic gradients at high transmission rates. This effect was reversed for strategies targeted  
46 at symptomatics only. Our results emphasise the importance of test-and-tracing strategies  
47 and maintaining low transmission rates for efficiently controlling COVID19 spread, both at  
48 landscape scale and in urban areas.

49

50

51

## 52 **Author summary**

53 The spread of infectious diseases is the outcome of contact patterns and involves source-sink  
54 dynamics of how infectious individuals spread the disease through pools of susceptible  
55 individuals. Control strategies that aim to reduce disease spread often need to accept ongoing  
56 transmission chains and therefore, may not work equally well in different scenarios of how  
57 individuals and populations are connected to each other. To understand the efficacy of  
58 different control strategies to contain the spread of COVID19 across gradients of urban and  
59 rural populations, we simulated a large range of different control strategies in response to  
60 regional COVID19 outbreaks, involving regional lockdown and the isolation individuals that  
61 express symptoms and those that developed not symptoms but may contribute to disease  
62 transmission. Our results suggest that isolation of asymptomatic individuals through intensive  
63 test-and-tracing is important for efficiently reducing the epidemic size. Regional lockdowns  
64 and the isolation of symptomatic cases only are of limited efficacy for reducing the epidemic  
65 size, unless overall transmission rate is kept persistently low. Moreover, we found high  
66 overall transmission rates to result in relatively larger epidemics in urban than in rural  
67 communities for these control strategies, emphasising the importance of keeping transmission  
68 rates constantly low in addition to regional measures to avoid the disease spread at large  
69 scale.

70

71

72

73

74

75

76

77

## 78 **Introduction**

79 In the absence of a vaccine against COVID-19 during the initial pandemic phase,  
80 stakeholders are confronted with challenging decision-making to balance constraints of social  
81 interaction and the efficient isolation of infectious individuals with economic and social  
82 pressures. There is now growing scientific evidence of how different containment strategies  
83 compare to each other amid the challenges of asymptomatic disease transmission and the  
84 ongoing need for improved estimates of epidemiological key parameters [1, 2]. Non-  
85 pharmaceutical interventions for curbing the spread of COVID-19 rely on the isolation of  
86 infectious individuals or general social distancing policies to reduce interactions between  
87 undetected infectious individuals and those susceptible to the disease. During uncontrolled  
88 pandemic spread, a central aim is to reduce case incidence in order to release the pressure on  
89 health systems. A more fundamental, long-term, goal should be to reduce the overall  
90 epidemic size and allow particularly those most prone to suffer from the disease to escape  
91 infection until a pharmaceutical measure such as a vaccine is in place.

92

93 Control strategies are likely to be regional, and temporal, aiming to reduce the time-  
94 dependent reproduction number  $R$ , while accepting that ongoing transmission is long term.  
95 But how should these regional and temporary strategies account for disease spread in ever-  
96 changing transmission landscapes? One particular question faced by many countries is how  
97 do different control strategies differ in their efficacy in preventing disease spread across  
98 urban-rural gradients of different population densities and connectivity in urban and rural  
99 landscapes?

100

101 The spread of infectious disease is rarely random. It is instead likely driven by the complex  
102 and heterogeneous social interaction patterns of humans and the stark gradient between urban

103 and rural populations. In a landscape context, contact opportunities within and among  
104 populations across urban-rural gradients, and source-sink dynamics arising from infectious  
105 individuals encountering pools of susceptible individuals, are the ultimate drivers of disease  
106 spread. Disease spread is thus hampered if contact opportunities are lower in poorly mixed  
107 populations [3-5]. Heterogeneity in contact patterns of individuals and among social groups is  
108 also assumed to impact the depletion of the pool of susceptible individuals and the build-up  
109 of possible herd immunity that prevent further spread [6, 7]. Hence, future short- and long-  
110 term mitigation strategies that focus on managing regional and erratic outbreaks would  
111 benefit from a better understanding of which control strategies provide the best possible  
112 outcome under variable regional conditions.

113

114 To the best of our knowledge, there is so far little evidence of how various disease control  
115 strategies differ in their efficacy across urban-rural gradients [8]. To address this gap, using  
116 an individual-based metapopulation model, we explore the outcomes of different control  
117 strategies to contain the epidemic size of COVID-19 in ever changing disease landscapes of  
118 case numbers and susceptible depletion, which involve strong urban-rural gradients.

119

120 Our modelling approach is strategic, in contrast to many tactical COVID-19 simulation  
121 models that have focused on replication of specific characteristics of real outbreaks with the  
122 aim of predicting the epidemic in specific locations [1, 9, 10]. Rather than modelling a certain  
123 scenario, we aim to define wide ranges and explore the model behaviour across a large array  
124 of combinations of transmission and control parameters. The influence of each parameter on  
125 particular outcomes can then be explored statistically. In this manner we aim to highlight how  
126 basic properties of realistic metapopulations' structure that include urban-rural gradients, can  
127 affect the impact of control measures.

128

## 129 **Methods**

### 130 *Case study of a rural-urban metapopulation in Wales*

131 In order provide an empirical basis to explore possible COVID-19 spread across an urban-  
132 rural gradient and the efficacy of different disease control measures, we selected four  
133 counties in southwestern Wales (Pembrokeshire, Carmarthenshire, Swansea, Neath Port  
134 Talbot) with a total human population size of 701,995 (hereafter termed ‘metapopulation’)  
135 dispersed over an area of 4,811 km<sup>2</sup> as a case study. This area was selected because of its  
136 strong urban-rural gradient, from city centres to sparsely occupied farming localities, and  
137 readily available demographic data.

138

139 We used demographic data from the United Kingdom 2011 census (Office for National  
140 Statistics, 2011, [www.ons.gov.uk](http://www.ons.gov.uk)), and constructed a metapopulation model at the level of  
141 Lower Layer Super Output Area (LSOA), which provided  $M = 422$  geographical units of  
142 regional populations with a mean of 1,663 individuals (SD = 387) each.

143

144 We used a gravity model to define the connections between populations, as it is capable of  
145 reflecting the connectivity underpinning landscape-scale epidemics [11, 12]. In particular, a  
146 gravity model was chosen as the LSOA administrative units are characterized by fairly  
147 similar population sizes, although they can have widely areas and hence different population  
148 densities. We calculated for each pair of populations a gravity measure  $T_{i,j}$  of the relative  
149 strength of how individuals are attracted to population  $i$  from populations  $j$  by accounting for  
150 local population sizes  $N$  and weighted pairwise Euclidian distance measures  $d^{\zeta}$ , including the  
151 ten nearest populations  $k$  of the attractive population:

152

$$T_{i,j} = \frac{\log\left(N_i + \sum_{k=1}^{10} \frac{N_k}{d_{i,k}^\zeta}\right) * \log(N_j)}{d_{i,k}^\zeta} \quad (1)$$

154

155 We assumed this approach to reflect reasonably well situations in which people are most  
156 attracted to higher density population clusters of urban populations (i.e. Swansea in our case  
157 study; the arbitrary selected number of ten nearest populations generates larger values of  $T_{i,j}$   
158 if the attractant population is closely surrounded by others; **Fig S1**). The scaling factor  $\zeta$  ( $0 \leq$   
159  $\zeta \leq 1$ ) is a sampled parameter that may vary across scenarios, accounting for the uncertainty  
160 in population connectivity. For each population  $i$ , we computed a regional gravity index (with  
161 self-terms of  $T_{i,j}^*$  for  $i=j$  being zero):

162

$$c_i = \sum_{j=1}^M T_{i,j}^* \quad (2)$$

164

165 based on the scaled (mean subtracted from values divided by 1 SD) values of  $T_{i,j}$  (denoted  
166  $T_{i,j}^*$ ), which we assumed to reflect the overall connectivity of the population within the global  
167 metapopulation. We used values of  $T_{i,j}^*$  multiplied by the commuter travel frequency among  
168 populations ( $\rho$ ) to compute the number of individuals visiting each population from  
169 elsewhere.

170

171 Within each local patch in the metapopulation, individuals encounter each other depending  
172 on their social interactions. The daily within-population contact numbers  $F_{i,t}$  for any  
173 individual  $i$  at time  $t$  is assumed to be a random draw given by the sum of contacts drawn  
174 from a negative binomial (with  $r = 3$  and  $p = 0.26$ , resulting in contact numbers with mean of  
175 9 and SD of 6) and lognormal distribution (with mean = 3 and SD = 2, resulting in additional

176 contact numbers with mean of 12 and SD of 16), whereby the lognormal distribution  
177 accounts for the ‘long-tail’ of contact frequency distributions. These parameters were based  
178 on a previous study of social contact frequencies in the UK [13]. For simplicity, and having  
179 in mind the main focus of this study on metapopulation-level patterns of disease spread, we  
180 did not account for repeated contact with the same individuals such as household or group  
181 members over different days. For simplicity, commuting individuals were assumed to return  
182 to their home populations in each time step, and their contacts were draw in the same way as  
183 for non-commuting individuals.

184

### 185 *Modelling the outcome of different disease control strategies in variable disease landscapes*

186 We ran numerical simulations of an individual-based stochastic difference equation S-E-A-I-  
187 R model at daily time steps (see **Supplementary materials**), with individuals transitioning  
188 from a (S)usceptible compartment to being (E)xposed if infected. Exposed individuals  
189 become either infectious and symptomatic (I) or infectious but asymptomatic (A) after an  
190 incubation period of  $\tau$  days. They then transition to a (R)emoved compartment with the  
191 recovery rate  $\gamma$ , which removes them from taking any further part in the transmission cycle.  
192 Both symptomatic and asymptomatic individuals can expose those susceptible to the virus.

193

194 The force of infection  $\lambda_{i,t}$ , i.e. the probability that a susceptible individual  $i$  acquires SARS-  
195 CoV-2 at time  $t$ , is calculated by considering the probabilities of the virus being transmitted  
196 from any interacting infected individual  $k$  (with  $k \in 1 \dots K_{i,t}$ , and  $K_{i,t}$  being the number of all  
197 infectious individuals in the randomly sampled daily contact number  $F_{i,t}$  of individual  $i$ );  $\lambda_{i,t}$   
198 can be computed based on the probability that none of the contact events with an infectious  
199 individual leads to an infection:

200



201 
$$\lambda_{i,t} = 1 - \prod_{k \in \{1 \dots K_{i,t}\}} (1 - \beta \omega_k) \quad (3)$$

202

203 where  $\beta$  is the disease transmission parameter, and  $\omega_k$  is a scaling factor of infectiousness of  
204 asymptomatic relative to infectious individuals with  $0 < \lambda_{i,t} < 1$ .

205

206 To explore different scenarios of local and global epidemic sizes, we accounted for different  
207 pandemic stages and uncertainty in epidemiological parameters by varying systematically the  
208 following six parameters (see Supplementary Material, Table S1):

209

- 210 1) Transmission parameter ( $\beta$ ),
- 211 2) The proportion of individuals that remain asymptomatic after infection ( $\phi$ ),
- 212 3) The relative infectiousness of asymptomatic disease carriers ( $\omega$ ),
- 213 4) Commuter travel frequency of individuals between populations ( $\rho$ ),
- 214 5) Density dependence of individual contact numbers ( $\delta$ ),
- 215 6) Proportion of the overall population resistant/ recovered from infection at the onset of  
216 simulations.

217

218 Density-dependence of contact numbers (a population-level attribute) was modelled by  
219 calculating the scaled regional population density (i.e. all values divided by maximum  
220 density) to the power of the parameter  $\delta$  and multiplied the corresponding values with the  
221 lognormal ('long-tail') component of the daily contact numbers  $F_{i,t}$ . The resulting value  
222 corresponds to the same contact frequencies if  $\delta$  approaches zero and truncated contact  
223 frequencies at low population densities if  $\delta$  approaches one. Due to the lack of better  
224 empirical evidence, we assumed this approach to represent the situation in which an increase  
225 in population density (in urban areas) can result in a larger overall number of random

226 encounters between citizens and higher contact frequencies between individuals of the same  
227 community in urban areas [14].

228

229 To assess and compare the efficacy of different, idealized, disease control strategies, we  
230 defined three general control strategies:

231

232 i) Trace and isolation of any infected individuals with a certain proportion ( $\kappa$ ) of all infected  
233 individuals successfully isolated (removal of individuals in disease states E, A, I, reflecting  
234 scenarios where intensive and continuous testing and/or intensive contact tracing would allow  
235 removal of any infected individuals; termed ‘trace all’ in figures).

236

237 ii) Trace and isolation of symptomatic individuals only with a certain proportion ( $\varepsilon$ ) of  
238 symptomatic individuals successfully isolated (removal of individuals in disease state I,  
239 reflecting scenarios where symptomatic cases isolate without any additional contract tracing  
240 or testing; termed ‘trace symptomatic only’ in figures).

241

242 iii) Regional temporary reduction of transmission rates (‘regional lockdown’) in response to a  
243 regional outbreak within the modelled LSOA administrative units, with four parameters to  
244 vary for decision making and control: (1) a threshold  $\alpha$  defining the proportion of the  
245 regional population to be in disease state I, (2) lockdown stringency  $\phi$  (the factor by which  
246 the transmission parameter is reduced), (3) travel ban distance  $\nu$  (the maximum distance from  
247 which individuals are allowed to visit a locked-down population), and (4) duration of regional  
248 lockdown ( $\eta$ ).

249

250 For simplicity, we did not account for possible individual heterogeneity in transition  
251 probabilities between different disease states but rather assumed constant ‘average’ transition  
252 probabilities in each scenario, albeit waiting times at different disease states are  
253 heterogeneous for many infectious diseases [15]. Similarly, we assume that the delay in the  
254 detection of individuals in different disease states is covered in the ‘average’ parameter of  
255 tracing/removing these individuals from transmission cycles as part of control strategies. We  
256 do so as here we are solely interested in population level outcomes of COVID19 spread in  
257 response to different control strategies.

258

### 259 *Numerical simulations*

260 To be able to assess the efficacy of these control strategies as compared to a reference, we  
261 defined 10,000 ‘baseline’ transmission scenarios by varying the epidemiological parameters  
262 defining the spread scenarios (1-6 above). We performed independent numerical simulations  
263 for each parameter combination. We then combined each baseline transmission scenario with  
264 varying parameters for each of the three control strategies, running a total of 40,000  
265 simulations, each for a time period of 100 days, which we assumed to be sufficiently long to  
266 capture the epidemic dynamics in response to different parameter values. Parameter values  
267 were sampled using latin hypercube sampling [16]; see Table S1 for ranges of parameter  
268 values used.

269

270 We started each simulation by randomly allocating  $n = 422$  individuals as infectious  
271 (corresponding to the number of populations, but not necessarily one infectious individual in  
272 each population and infectious individuals are not necessarily seeded in high density  
273 populations) in the metapopulation. While this seeding of the epidemic does not represent any  
274 particular ‘true’ epidemic state in the studied population, we have chosen this the seeding

275 together with the varying number of initially resistant proportion of populations to enable us  
276 to explore different scenarios of dynamic disease landscapes rather than any particular past or  
277 current state.

278

### 279 *Output summary*

280 For each simulation, we computed the epidemic sizes as the numbers of individuals that had  
281 been symptomatic (we considered symptomatic cases only as asymptomatic cases are less  
282 likely to result in hospitalization or any other severe health burden) for each population and at  
283 the metapopulation scale (i.e. entire population). In order to explore the sensitivity of  
284 different control strategies to different epidemiological parameters, we calculated the relative  
285 differences in epidemic sizes ('relative epidemic size') for each disease control scenario and  
286 the corresponding baseline scenario at regional and metapopulation scale such that values  
287 close to zero mean effective control and larger values mean less effective control. Moreover,  
288 we computed for each baseline scenario the strength of correlation (expressed as the  $r$  value  
289 from Spearman rank correlation) between the regional relative epidemic size and the  
290 respective regional gravity index ('urban-rural gradient in relative epidemic size') in order to  
291 explore whether control strategies varied in their efficacy across urban-rural gradients. A  
292 strong positive correlation can be interpreted as a strong urban-rural gradient of disease  
293 spread, with smaller relative epidemic sizes in rural areas, where connectivity is generally  
294 lower. We also computed the strength of correlation between the epidemic sizes of baseline  
295 scenarios (uncontrolled outbreaks) and the respective regional gravity index.

296

297 In order to explore variation in the relative epidemic size and efficacy of different control  
298 strategies for different scenarios, we used generalised linear models (GLMs) and boosted  
299 regression trees (BRT) as implemented in the R package *dismo* [17]. We express results in

300 terms of direction of effects (i.e. decrease/increase in relative epidemic size, reflecting  
301 higher/lower control efficacy) and relative influence (i.e. % of variance explained by various  
302 parameters in the corresponding BRT model) for those parameters that appear to show  
303 ‘significant’ effects in both GLM and BRT (i.e. GLM coefficients clearly distinct from zero,  
304 relative parameter influence > 5%).

305

306 All analyses and plotting were conducted in R version 4.0 [18].

307

## 308 **Results**

309 The urban-rural gradient in epidemic sizes (expressed as rank correlation coefficient between  
310 the regional epidemic size and the regional gravity index) considerably decreased among  
311 baseline scenarios (uncontrolled outbreaks) with larger transmission parameters ( $\beta$ ,  
312 explaining 57% of changes in total epidemic sizes). This indicates that larger outbreaks in  
313 urban areas occur mostly at low transmission parameters. In addition, the urban-rural gradient  
314 in total epidemic sizes decreased with higher commuter travel frequency ( $\rho$ , 19% of changes  
315 in total epidemic sizes) and stronger distance weighting in the underlying gravity model ( $\zeta$ ,  
316 15% of changes in total epidemic sizes). This suggests that these factors not only facilitate  
317 spatial disease spread but also determine whether outbreaks are larger in urban than in rural  
318 environments.

319

### 320 *Efficacy of different control strategies in changing disease landscapes*

321 Trace and isolation of all infected individuals (trace all) was by far the most efficient control  
322 strategy in our simulations (**Fig 1**): no simulated scenario with  $\geq 47\%$  of infected individuals  
323 removed ( $\kappa$ ) had a relative epidemic size > 5% of the respective baseline scenario. Lowering  
324 the epidemic size through isolation of infected individuals was less efficient for large

325 transmission parameters ( $\beta$ , explaining 19% relative influence on changes in relative  
326 epidemic sizes, **Fig 2**).

327

328 Trace and isolation of symptomatic individuals (trace symptomatic only) was of limited  
329 efficacy in lowering epidemic size in our simulations. The efficacy of these control strategies  
330 largely depends on small transmission parameters ( $\beta$ , 72% relative influence), whereas  
331 variation in the proportion of symptomatic individuals being isolated ( $\varepsilon$ ) explained only 12%  
332 in relative epidemic sizes. The efficacy of this control strategy was further hampered by  
333 increasing proportions of asymptomatic cases ( $\varphi$ , 9% relative influence).

334

335 Regional lockdown scenarios appeared to be of limited efficacy in our simulations (**Fig 1**)  
336 and largely depend on small transmission parameters ( $\beta$ , 70% relative influence) (**Fig 2**).  
337 Their efficacy was sensitive to the regional threshold levels for lockdown implementation ( $\alpha$ ,  
338 10% relative influence) and lockdown stringency ( $\phi$ , 6% relative influence). A reduction of  
339 relative epidemic sizes to 5% of those of the respective baseline scenarios through regional  
340 lockdowns was only achieved for regional lockdown threshold levels of  $\leq 1\%$  the populations  
341 being symptomatic.

342

### 343 *Variation in control efficacy across urban-rural gradients*

344 The strength of the urban-rural gradient in relative epidemic sizes resulting from isolation of  
345 all infected individuals (E,A,I) declined with increasing proportions of infected individuals  
346 isolated ( $\kappa$ , 46% relative influence, **Fig 3**) and increased with increasing transmission  
347 parameters ( $\beta$ , 24% relative influence), suggesting that larger transmission rates makes it  
348 relatively more challenging to control the spread in urban than in rural areas. In contrast, the  
349 more individuals are isolated (increasing  $\kappa$ ), the more efficiently can epidemics be also

350 contained in urban environments (i.e. resulting in less strong urban-rural gradients in relative  
351 epidemic size), despite a concentration of cases there, as depicted by mostly positive  
352 correlation coefficients of the urban-rural gradient in relative epidemic size (**Fig 4**).

353

354 The completely opposite effect was found for the isolation of symptomatic individuals only  
355 (**I**). The strength of the urban-rural gradient in relative epidemic size declined with increasing  
356 transmission parameters ( $\beta$ , 52% relative influence) but increased with increasing proportions  
357 of symptomatic individuals isolated ( $\varepsilon$ , 12% relative influence). Hence, larger transmission  
358 rates make reduction in epidemic size by isolation of symptomatic individuals only more  
359 challenging in rural rather than in urban areas. The urban-rural gradient in relative epidemic  
360 size further decreased with larger proportions of asymptomatic cases ( $\varphi$ , 11% relative  
361 influence), decreased with higher commuter travel frequency ( $\rho$ , 8% relative influence) and  
362 increased with stronger density dependence in contact numbers ( $\delta$ , 7% relative influence, **Fig**  
363 **3**).

364

365 In response to regional lockdown strategies, the strength of the urban-rural gradient in  
366 relative epidemic size increased with increasing transmission parameters ( $\beta$ , 34% relative  
367 influence), increasing travel frequencies (27% relative influence), and stronger distance  
368 weighting in the underlying gravity model ( $\zeta$ , 18% relative influence, **Fig 3**).

369

## 370 **Discussion**

371 Decision-making to balance efficient COVID19 control with socio-economic pressures is a  
372 challenging task against the backdrop of asymptomatic disease spread and ever-changing  
373 disease landscapes. We show that isolation of symptomatic cases, or regional lockdowns in  
374 response to local outbreaks, have limited efficacy in terms of reducing overall epidemic sizes,

375 unless overall transmission rate is kept persistently low. Isolation of non-symptomatic  
376 infected individuals, which may be detected by effective test and trace approaches, is pivotal  
377 to reduce overall epidemic size over a wider range of transmission scenarios. By considering  
378 an ‘urban-rural epidemic gradient’ as the strength of correlation between regional epidemic  
379 size and connectivity within a region, we show that under certain conditions, control  
380 measures are of limited efficacy in urban compared to rural areas. Intervention strategies  
381 focusing on the isolation of non-symptomatic individuals and regional lockdowns, for  
382 example, had the strongest urban-rural outbreak gradients at high transmission rates. In  
383 contrast, interventions targeting symptomatic virus carrier only had the reverse effect.

384

385 Our results emphasise the importance of efficient detection of infectious individuals through  
386 test and trace approaches for containing the spread of COVID-19 [2, 19, 20], while also  
387 uncovering that some methods will be less efficient in urban areas under the post-lockdown  
388 situation unless transmission rates are kept constantly low.

389

390 Efficient removal of all infectious individuals (including non-symptomatics) has the potential  
391 to restrain total epidemic size by successfully suppressing landscape-scale disease spread and  
392 the corresponding source-sink dynamics of how the disease may spread and re-emerge among  
393 populations. We found regional lockdowns to be only effective in terms of reducing overall  
394 epidemic size if implemented at low threshold levels and low transmission rates. This is  
395 likely due to the fact that only under these conditions can landscape-scale spread of the  
396 disease be avoided. These findings are in line with previous suggestions that temporary  
397 lockdowns do not necessarily contain overall epidemic size in a metapopulation context over  
398 medium to long time periods [21], even if they may be useful for reducing local case number  
399 over short time periods to avoid an overload of health capacities [22-24].



400

401 In practice, the prominent example of the locally restricted lockdown implemented in the city  
402 of Leicester in the UK, which began in June 2020 is just one example of mounting evidence  
403 that regional lockdowns do not necessarily see an reduction in disease transmission during  
404 the following weeks [25], which would ideally prevent spread of the virus beyond the local  
405 context. This slow response of incidence decline following regional lockdowns is in line with  
406 our finding and more general suggestions that disease with asymptomatic transmission  
407 pathways can only be controlled with intensive test and trace approaches [26].

408

409 Surprisingly, we found travel frequency and possible density dependence in contact  
410 frequency to have rather small relative impact on overall epidemic size compared to the  
411 transmission parameter (**Fig 2**). Despite the recognised importance of connectivity, travel  
412 patterns and metapopulation structure on disease spread [27-29] our results highlight the  
413 importance of overall transmission rates on disease spread and epidemic size. This has  
414 important management implications, as it points to measures that might allow for continuous  
415 long-term lowering of transmission rates. Such measures, we suggest, are considerably more  
416 efficient than any short-term measures of changing control stringency in response to actual  
417 case numbers for reducing the overall epidemic size.

418

419 We found the magnitude of transmission rate to also determine the success of different  
420 control strategies in urban versus rural areas, leading to varying urban-rural epidemic  
421 gradients in response to varying transmission rates and different control strategies (**Fig 3**).  
422 For interventions focused on isolating both non-symptomatic and symptomatic individuals  
423 and regional lockdowns, our results reveal the strongest urban-rural epidemic gradients at  
424 high transmission rates, indicating a reduced efficacy of such control measure in urban areas

425 under these conditions. These results suggest that at high transmission rates, the urban-rural  
426 epidemic gradient is enforced by the overall poorly curbed disease spread at metapopulation  
427 level (see **Fig 4**). Conversely, we found the urban-rural gradient in epidemic sizes to be  
428 mostly masked at high transmission rates for measures targeted at symptomatics only,  
429 suggesting that that these measures (which are generally of moderate to low efficacy), would  
430 not contain disease spread at metapopulation level unless transmission rates are kept  
431 constantly low (see **Fig 4**). Exploring such effects warrants further investigation based on  
432 empirical data and relevant spatiotemporal models of disease spread under variable  
433 conditions of contact frequencies and control efforts. Such more detailed research may also  
434 account for first insights into variable compliance in response to intervention strategies. A  
435 recent study, for example, found slightly larger reductions in average mobility in high density  
436 than low density areas in the UK [30].

437

438 In contrast to many forensic COVID-19 models that have focused on forecasting real  
439 outbreaks in specific locations [1, 9, 10] our model is strategic, with a focus on exploring  
440 general mechanisms emerging from across a large range of modelled scenarios. A direct  
441 match to the ongoing epidemic in the study area is unfeasible because we do not account for  
442 any particular real-world starting conditions nor the temporary changes in human interactions  
443 in response to changing policy. Also, as we are not aware of detailed estimates of relevant  
444 epidemiological parameters such as how transmission rate varies among age groups in our  
445 study area, we do not account for age structure in our model, even though, as it has been  
446 shown, COVID-19 effects and expression of symptoms are rather different between children  
447 and adults [31]. These effects might be exacerbated by a potential systematic variation in  
448 demographic community composition in urban and rural areas. However, with an area-wide  
449 spread of COVID-19 in our study area and a concentration of cases in urban communities

450 during the first six months of the epidemic, some general patterns found in model output and  
451 empirical data appear to be compatible (personal observations). Given more detailed data of  
452 spatiotemporal disease spread and better estimates of epidemiological key parameters, future  
453 studies may narrow down the currently intractable large parameter space through statistical  
454 approximation methods in order to identify when and how management efforts may results in  
455 disease extirpation versus long-term persistence [32].

456

457 The most important implication from our model is that priority should be given to any  
458 reliable and feasible measures that constantly keep transmission rate low as opposed to  
459 relying on local lockdowns to stamp out outbreaks. The success of any short-period  
460 interventions is limited if overall transmission rate remain high and facilitate disease spread  
461 within and among populations. We conclude that in the absence of an intervention strategy  
462 that would ensure rapid eradication of COVID-19, different intervention strategies do not  
463 work as efficiently in urban as in rural communities. Priority should thus be given to further  
464 research on how the most vulnerable individuals can be best protected at minimal cost for  
465 entire metapopulations. While post-lockdown situations of low transmission rates and  
466 reduced cases number are tempting to ease interventions, we believe that ongoing source-sink  
467 dynamics of disease spread cannot be ignored. Successful regional disease control during a  
468 pandemic should not ignore the fact that those communities that successfully escaped the first  
469 epidemic waves remain the most vulnerable because of large pools of individuals yet to be  
470 exposed to COVID-19.

471

## 472 **Data accessibility**

473 The R code for this study can be found on GitHub [https://github.com/konswells1/COVID19-](https://github.com/konswells1/COVID19-LSOA-metapopulation-model)  
474 [LSOA-metapopulation-model](https://github.com/konswells1/COVID19-LSOA-metapopulation-model).

475

## 476 **Acknowledgments**

477 We acknowledge the support of funding from the Welsh Government for this project, and  
478 also the Supercomputing Wales project, which is part-funded by the European Regional  
479 Development Fund (ERDF) via the Welsh Government.

480

## 481 **Author contributions**

482 KW – Conceptualization, Formal analysis, Writing – original draft, Writing – review &  
483 editing

484 ML – Conceptualization, Formal analysis, Writing – review & editing

485 BC - Formal analysis, Writing – review & editing

486 BL - Formal analysis, Writing – review & editing

487 RRK - Formal analysis, Writing – review & editing

488 ALL - Formal analysis, Writing – review & editing

489 SDWF - Formal analysis, Writing – review & editing

490 MBG – Conceptualization, Formal analysis, Funding acquisition, Writing – review & editing

491

492

493

494

## 495 **References**

496 1. Davies NG, Kucharski AJ, Eggo RM, Gimma A, Edmunds WJ, Jombart T, et al. Effects of  
497 non-pharmaceutical interventions on COVID-19 cases, deaths, and demand for hospital  
498 services in the UK: a modelling study. *The Lancet Public Health*. 2020;5(7):e375-e85. doi:  
499 10.1016/S2468-2667(20)30133-X.

- 500 2. Hellewell J, Abbott S, Gimma A, Bosse NI, Jarvis CI, Russell TW, et al. Feasibility of  
501 controlling COVID-19 outbreaks by isolation of cases and contacts. *The Lancet Global*  
502 *Health*. 2020;8(4):e488-e96. doi: 10.1016/S2214-109X(20)30074-7.
- 503 3. May RM. Network structure and the biology of populations. *Trends in Ecology and*  
504 *Evolution*. 2006;21(7):394-9.
- 505 4. Rivera MT, Soderstrom SB, Uzzi B. Dynamics of Dyads in Social Networks: Assortative,  
506 Relational, and Proximity Mechanisms. *Annual Review of Sociology*. 2010;36(1):91-115.  
507 doi: 10.1146/annurev.soc.34.040507.134743.
- 508 5. Block P, Hoffman M, Raabe IJ, Dowd JB, Rahal C, Kashyap R, et al. Social network-  
509 based distancing strategies to flatten the COVID-19 curve in a post-lockdown world.  
510 *Nature Human Behaviour*. 2020;4(6):588-96. doi: 10.1038/s41562-020-0898-6.
- 511 6. Gomes MGM, Corder RM, King JG, Langwig KE, Souto-Maior C, Carneiro J, et al.  
512 Individual variation in susceptibility or exposure to SARS-CoV-2 lowers the herd  
513 immunity threshold. medRxiv. 2020:2020.04.27.20081893. doi:  
514 10.1101/2020.04.27.20081893.
- 515 7. Britton T, Ball F, Trapman P. A mathematical model reveals the influence of population  
516 heterogeneity on herd immunity to SARS-CoV-2. *Science*. 2020;369(6505):846-9. doi:  
517 10.1126/science.abc6810.
- 518 8. O'Sullivan D, Gahegan M, Exeter DJ, Adams B. Spatially explicit models for exploring  
519 COVID-19 lockdown strategies. *Transactions in GIS*. 2020;24(4):967-1000. doi:  
520 10.1111/tgis.12660.
- 521 9. Abbott S, Hellewell J, Thompson R, Sherratt K, Gibbs H, Bosse N, et al. Estimating the  
522 time-varying reproduction number of SARS-CoV-2 using national and subnational case  
523 counts [version 1; peer review: awaiting peer review]. Wellcome Open Research.  
524 2020;5(112). doi: 10.12688/wellcomeopenres.16006.1.

- 525 10. Danon L, Brooks-Pollock E, Bailey M, Keeling MJ. A spatial model of CoVID-19  
526 transmission in England and Wales: early spread and peak timing. medRxiv.  
527 2020:2020.02.12.20022566. doi: 10.1101/2020.02.12.20022566.
- 528 11. Tizzoni M, Bajardi P, Decuyper A, Kon Kam King G, Schneider CM, Blondel V, et al.  
529 On the use of human mobility proxies for modeling epidemics. PLoS Comp Biol.  
530 2014;10(7):e1003716. doi: 10.1371/journal.pcbi.1003716.
- 531 12. Dudas G, Carvalho LM, Bedford T, Tatem AJ, Baele G, Faria NR, et al. Virus genomes  
532 reveal factors that spread and sustained the Ebola epidemic. Nature. 2017;544:309. doi:  
533 10.1038/nature22040.
- 534 13. Danon L, Read JM, House TA, Vernon MC, Keeling MJ. Social encounter networks:  
535 characterizing Great Britain. Proceedings of the Royal Society B: Biological Sciences.  
536 2013;280(1765). doi: 10.1098/rspb.2013.1037.
- 537 14. Bailey M, Farrell P, Kuchler T, Stroebel J. Social connectedness in urban areas. Journal  
538 of Urban Economics. 2020;118:103264. doi: <https://doi.org/10.1016/j.jue.2020.103264>.
- 539 15. Conlan AJK, Rohani P, Lloyd AL, Keeling M, Grenfell BT. Resolving the impact of  
540 waiting time distributions on the persistence of measles. Journal of the Royal Society  
541 Interface. 2010;7(45):623-40.
- 542 16. Stein M. Large sample properties of simulations using latin hypercube sampling.  
543 Technometrics. 1981;29:143-51.
- 544 17. Elith J, Leathwick JR, Hastie T. A working guide to boosted regression trees. J Anim  
545 Ecol. 2008;77(4):802-13. doi: 10.1111/j.1365-2656.2008.01390.x.
- 546 18. R Development Core Team. R: A language and environment for statistical computing.  
547 Vienna, Austria: R Foundation for Statistical Computing; 2020.

- 548 19. Ferretti L, Wymant C, Kendall M, Zhao L, Nurtay A, Abeler-Dörner L, et al. Quantifying  
549 SARS-CoV-2 transmission suggests epidemic control with digital contact tracing. *Science*.  
550 2020:eabb6936. doi: 10.1126/science.abb6936.
- 551 20. Giordano G, Blanchini F, Bruno R, Colaneri P, Di Filippo A, Di Matteo A, et al.  
552 Modelling the COVID-19 epidemic and implementation of population-wide interventions  
553 in Italy. *Nat Med*. 2020. doi: 10.1038/s41591-020-0883-7.
- 554 21. Wells K, Lurgi M. COVID-19 containment policies through time may cost more lives at  
555 metapopulation level. *medRxiv*. 2020. doi: 10.1101/2020.04.22.20075093.
- 556 22. Jarvis CI, Van Zandvoort K, Gimma A, Prem K, Auzenbergs M, O'Reilly K, et al.  
557 Quantifying the impact of physical distance measures on the transmission of COVID-19 in  
558 the UK. *BMC Medicine*. 2020;18(1):124. doi: 10.1186/s12916-020-01597-8.
- 559 23. Ferguson NM, Laydon D, Nedjati-Gilani G, al. e. Report 9: Impact of non-  
560 pharmaceutical interventions (NPIs) to reduce COVID-19 mortality and healthcare  
561 demand. Imperial-College-COVID19-NPI-modelling, 2020 Contract No.: Report 9:  
562 impact of non-pharmaceutical interventions (NPIs) to reduce COVID-19 mortality and  
563 healthcare demand. March 16, 2020. [https://www.imperial-](https://www.imperial.ac.uk/media/imperial-college/medicine/sph/ide/gidafellowships/)  
564 [college/medicine/sph/ide/gidafellowships/](https://www.imperial.ac.uk/media/imperial-college/medicine/sph/ide/gidafellowships/)
- 565 24. Kissler SM, Tedijanto C, Goldstein E, Grad YH, Lipsitch M. Projecting the transmission  
566 dynamics of SARS-CoV-2 through the postpandemic period. *Science*. 2020:eabb5793.  
567 doi: 10.1126/science.abb5793.
- 568 25. Nazareth J, Minhas JS, Jenkins DR, Sahota A, Khunti K, Haldar P, et al. Early lessons  
569 from a second COVID-19 lockdown in Leicester, UK. *The Lancet*. 2020;396(10245):e4-  
570 e5. doi: 10.1016/S0140-6736(20)31490-2.
- 571 26. Fraser C, Riley S, Anderson RM, Ferguson NM. Factors that make an infectious disease  
572 outbreak controllable. *Proceedings of the National Academy of Sciences of the United*

- 573 States of America. 2004;101(16):6146-51. doi: 10.1073/pnas.0307506101. PubMed  
574 PMID: WOS:000220978000084.
- 575 27. Danon L, House T, Keeling MJ. The role of routine versus random movements on the  
576 spread of disease in Great Britain. *Epidemics*. 2009;1(4):250-8.  
577 doi:10.1016/j.epidem.2009.11.002.
- 578 28. Heesterbeek H, Anderson RM, Andreasen V, Bansal S, De Angelis D, Dye C, et al.  
579 Modeling infectious disease dynamics in the complex landscape of global health. *Science*.  
580 2015;347(6227). doi: 10.1126/science.aaa4339.
- 581 29. Keeling MJ, Gilligan CA. Metapopulation dynamics of bubonic plague. *Nature*.  
582 2000;407(6806):903-6. doi: doi:10.1038/35038073.
- 583 30. Jeffrey B, Walters CE, Ainslie KEC, Eales\* O, Ciavarella C, Bhatia S, et al. Report 24:  
584 Anonymised and aggregated crowd level mobility data from mobile phones suggests  
585 that initial compliance with COVID-19 social distancing interventions was high  
586 and geographically consistent across the UK. London: Imperial College COVID-19  
587 response team, 2020.
- 588 31. Davies NG, Klepac P, Liu Y, Prem K, Jit M, Pearson CAB, et al. Age-dependent effects  
589 in the transmission and control of COVID-19 epidemics. *Nat Med*. 2020. doi:  
590 10.1038/s41591-020-0962-9.
- 591 32. Wells K, Hamede RK, Jones ME, Hohenlohe PA, Storfer A, McCallum HI. Individual  
592 and temporal variation in pathogen load predicts long-term impacts of an emerging  
593 infectious disease. *Ecology*. 2019;100(3):e02613. doi: 10.1002/ecy.2613.  
594  
595  
596  
597



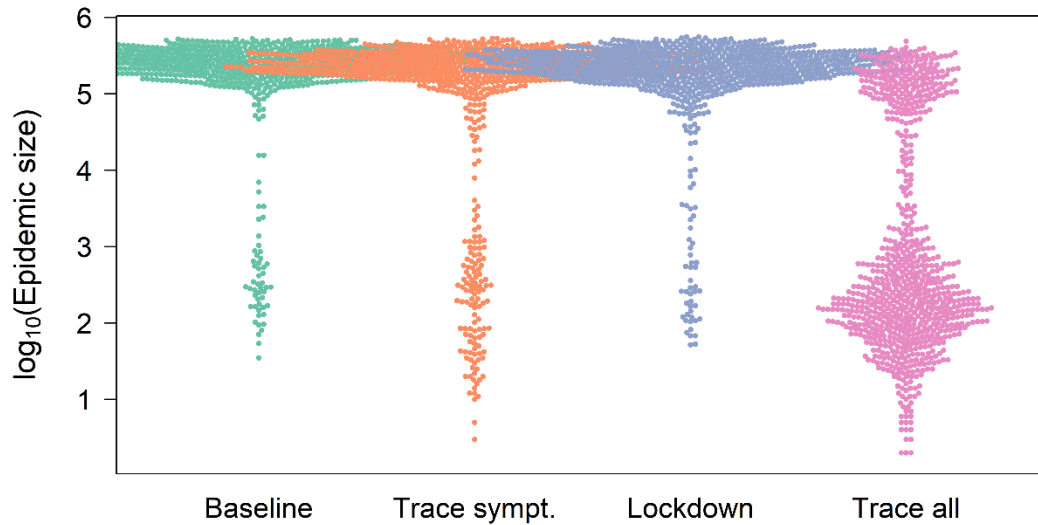

598

599 **Fig 1. Distribution of the total COVID-19 epidemic sizes across an urban-**

600 **rural gradient.** Plot shows  $\log_{10}$ -scale epidemic size at metapopulation level

601 resulting from simulating a large range of scenarios. Scenarios include:

602 ‘Baseline’: no control strategy; ‘Trace sympt.’: isolation of a certain percentage

603 of infectious/symptomatic virus carrier only; ‘Lockdown’: regional reduction of

604 transmission parameters in response to a certain number of

605 infectious/symptomatic virus carriers being present; ‘Trace all’: isolation of a

606 certain percentage of infected individuals (i.e. those in the disease states

607 exposed, asymptomatic virus carrier or infectious/symptomatic virus carrier).

608 To aid visualisation, the plot is based on a random selection of 10,000 out of

609 40,000 simulation results.

610

611

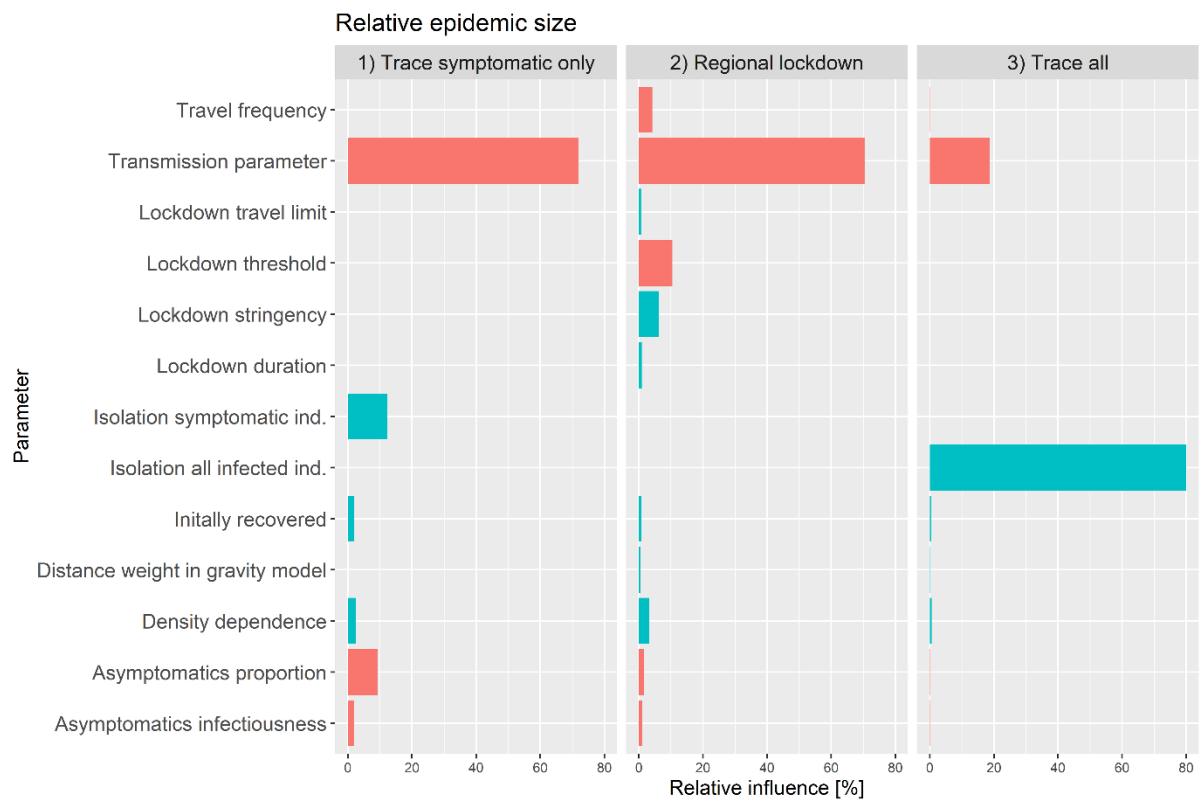

612

613 **Fig 2. Relative influence of different parameters on the relative epidemic**

614 **sizes.** Relative epidemic sizes were calculated for simulations with three

615 different control strategies compared to baseline scenarios of no COVID-19

616 control. The three different control strategies were ‘Trace symptomatic only’:

617 isolation of a certain percentage of infectious/symptomatic virus carrier only;

618 ‘Regional lockdown’: regional reduction of transmission rates in response to a

619 certain number of infectious/symptomatic virus carriers being present; and

620 ‘Trace all’: isolation of a certain percentage of individuals being infected in the

621 disease states exposed, asymptomatic virus carrier or infectious/symptomatic

622 virus carrier. Green bars indicate smaller and red bars larger relative epidemic

623 sizes with increasing parameter values.

624

625

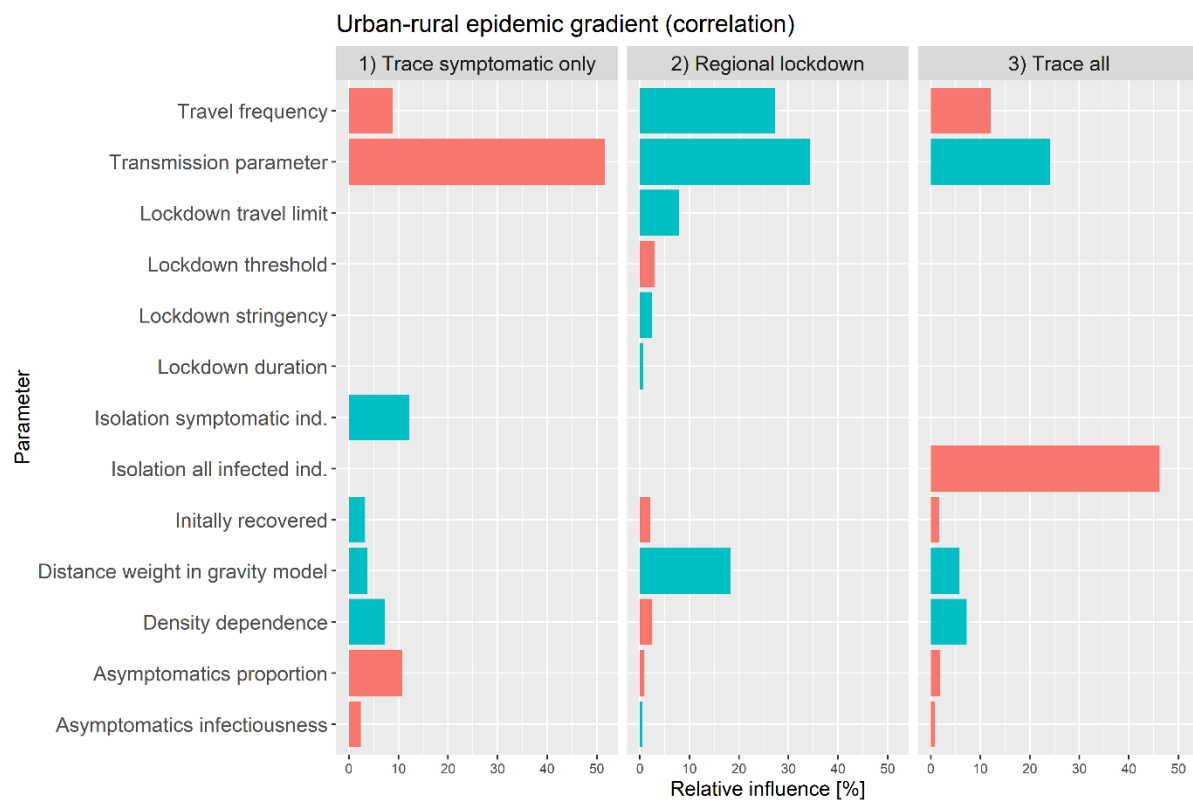

626

627 **Fig 3. Relative influence of different parameters on the ‘urban-rural**  
628 **gradient’ (correlation coefficients of regional relative epidemic sizes with**  
629 **connectivity across all populations).** Stronger correlations mean larger  
630 regional epidemic sizes in populations with increased connectivity, which are  
631 typically urban areas. Relative epidemic sizes were calculated for simulations  
632 with three different control strategies compared to baseline scenarios of no  
633 COVID-19 control. The three different control strategies were ‘Trace  
634 symptomatic only’: isolation of a certain percentage of infectious/symptomatic  
635 virus carrier only; ‘Regional lockdown’: regional reduction of transmission  
636 rates in response to a certain number of infectious/symptomatic virus carriers

637 being present; and ‘Trace all’: isolation of a certain percentage of individuals  
638 being infected in the disease states exposed, asymptomatic virus carrier or  
639 infectious/symptomatic virus carrier. Green bars indicate decreases and red  
640 bars increases in correlation strength with increasing parameter values.

641

642

643

644

645

646

647

648

649

650

651

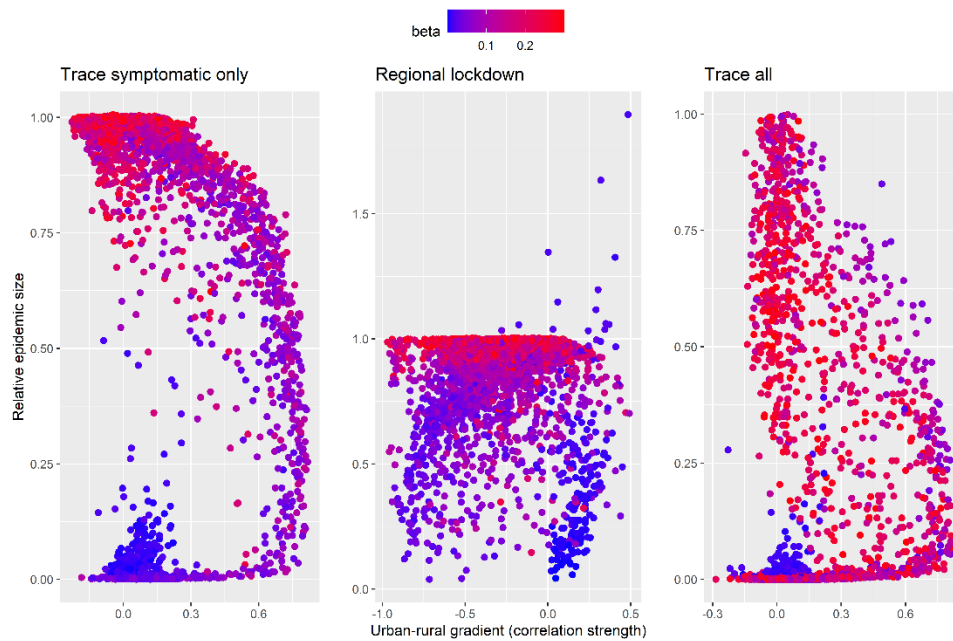

652

653 **Fig 4. Relationship between overall relative epidemic size for different control measures**

654 **and the underlying urban-rural gradient in epidemic size among populations.** Relative

655 epidemic sizes were calculated for simulations with three different control strategies

656 compared to baseline scenarios of no COVID-19 control. The urban-rural gradient in

657 epidemic size' was computed as the strength of correlation the regional relative epidemic size

658 and the respective population-level connectivity index. The three different control strategies

659 were 'Trace sympt.': isolation of a certain percentage of infectious/symptomatic virus carrier

660 only; 'Lockdown': regional reduction of transmission rates in response to a certain number of

661 infectious/symptomatic virus carriers being present; 'Trace all': isolation of a certain

662 percentage of individuals being infected in the disease states exposed, asymptomatic virus

663 carrier or infectious/symptomatic virus carrier. Each point represents the outcome from a

664 simulation with a different baseline scenario, coloured according to the respective value of

665 transmission parameter ( $\beta$ ).

666

667
